# Supplementary material
Source: MDPI journal article supplement (https://www.mdpi.com/2072-4292/14/2/268)
Supplement: s1 [file s1]

Remote Sensing

*Supplement of*

**Climate, CO<sub>2</sub>, and Anthropogenic Drivers of Accelerated Vegetation Greening  
in the Haihe River Basin**

**Wenjing Yang <sup>1,2</sup>, Yong Zhao <sup>2\*</sup>, Qingming Wang <sup>2</sup> and Buliao Guan <sup>2</sup>**

1 Department of Hydraulic Engineering, Tsinghua University, Beijing, 100082, China;  
yangwj20@mails.tsinghua.edu.cn

2 State Key Laboratory of Simulation and Regulation of Water Cycle in River Basin, China  
Institute of Water Resources and Hydropower Research (IWHR), Beijing, 100038, China

Correspondence to:

Y. Zhao ([zhaoyong@iwhr.com](mailto:zhaoyong@iwhr.com))

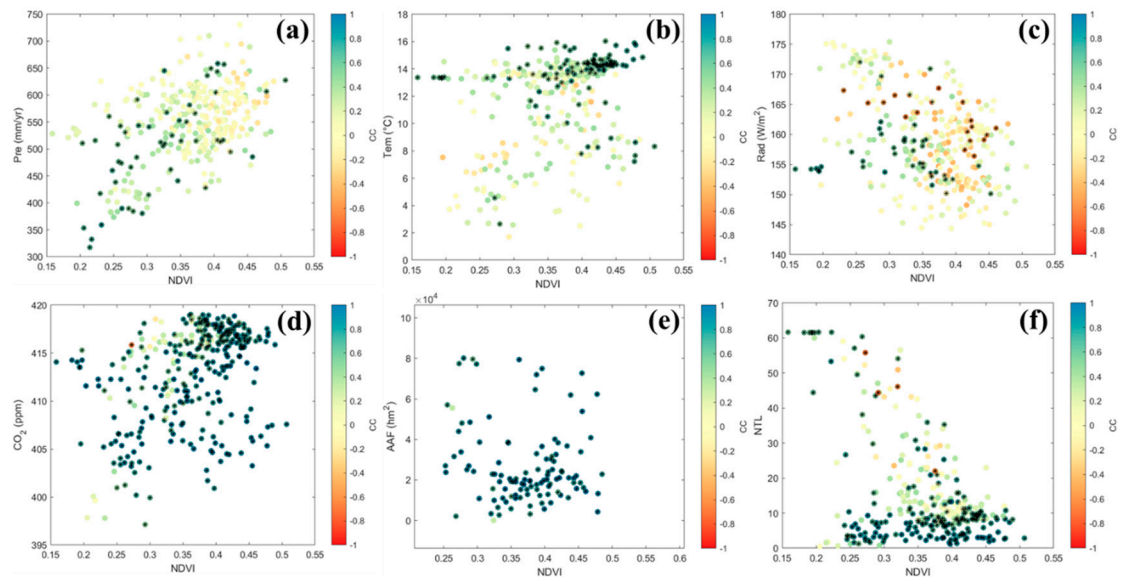

Figure S1 Scatter of correlation coefficient (CC) between mean NDVI and (a) Pre: precipitation; (b) Tem: air temperature; (c) Rad: solar radiation; (d) CO<sub>2</sub>; (e) AAF: afforestation area; (f) NTL: nighttime light at each county. Asterisks indicate  $p$ -value < 0.05.
