# Supplementary material
Source: MDPI journal article supplement (https://www.mdpi.com/2072-4292/14/2/268)
Supplement: s1 [file s1]

Archive with 1 entries (1 files):
- remotesensing-1528534-supplementary.pdf
